# Supplementary material for: FK506 Attenuates the MRP1-Mediated Chemoresistant Phenotype in Glioblastoma Stem-Like Cells
Source: PubMed Central journal article supplement (PMC6164673; doi:10.3390/ijms19092697), 2018-09-11
Supplement: ijms-19-02697-s001.pdf [file ijms-19-02697-s001.pdf]

# FK506 Attenuates the MRP1-Mediated Chemo-Resistant Phenotype in Glioblastoma Stem-Like Cells

Ángelo Torres, Valentina Arriagada, José Ignacio Erices, María de los Ángeles Toro, José Dellis Rocha, Ignacio Niechi, Cristian Carrasco, Carlos Oyarzún and Claudia Quezada

**Table S1**

List of primers used for RT-qPCR

| <b>Gene</b>       | <b>Forward primer</b>      | <b>Reverse primer</b>       |
|-------------------|----------------------------|-----------------------------|
| <b>MRP1 human</b> | 5' GGACTTTCGTGTGCTCCTGA 3' | 5' AGGTCAAGCTTTCCTGTACTG 3' |
| <b>MRP1 rat</b>   | 5' TGAACCATGAGTGTGCAGAA 3' | 5' TCACACCAAGCCAGCATCCT 3'  |
| <b>ACTB human</b> | 5' GGGGTCTTGAAGGTCTCA 3'   | 5' TGTCACCAACTGGGACGA 3'    |
| <b>ACTB rat</b>   | 5' TGTCACCAACTGGGACGATA 3' | 5' GGGGTCTTGAAGGTCTCAA 3'   |

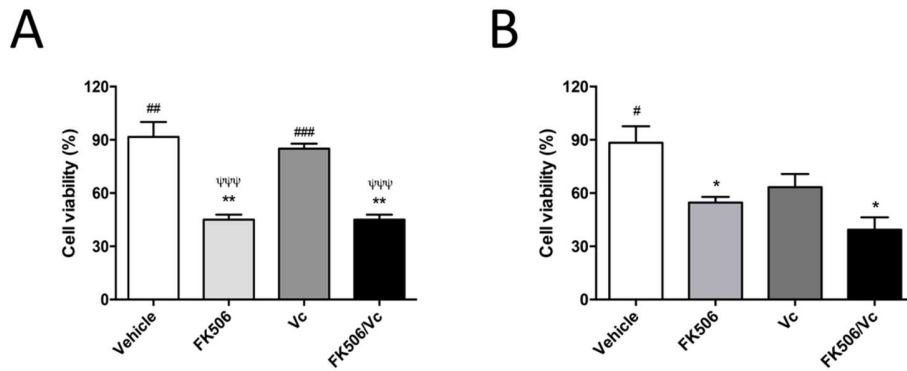

**Figure S1.** Cell viability measured by trypan blue exclusion assay in U87MG (A) and C6 (B) GSCs treated with vehicle (DMSO), FK506 (15 ng/mL) and/or Vincristine (Vc; 0,1  $\mu$ M). The graph represents the percentage of cell viability using vehicle as calibrator. Graphs represent the mean  $\pm$  S.D. \*P < 0.05 and \*\*P < 0.01 versus vehicle. #P < 0.05, ###P < 0.01 and ####P < 0.001 versus FK506.  $\psi\psi\psi$  P < 0.001 versus Vc. n = 3.

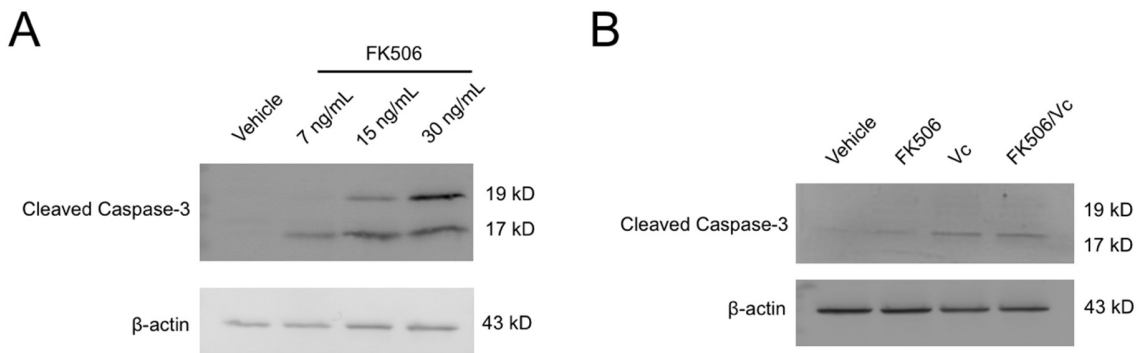

**Figure S2. A** Cleaved caspase-3 in U87MG-GSCs treated with vehicle (DMSO) and FK506 (7, 15 and 30 ng/mL). **B** Cleaved caspase-3 in C6-GSCs treated with vehicle (DMSO), FK506 (15 ng/mL) and/or Vincristine (Vc; 0,1  $\mu$ M).  $\beta$ -actin expression was used as normalizer in A) and B).

**A**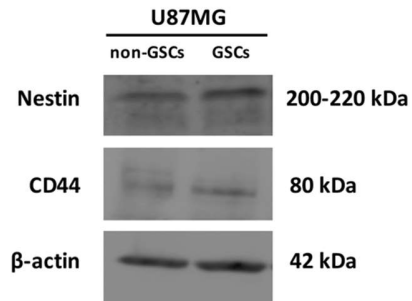**B**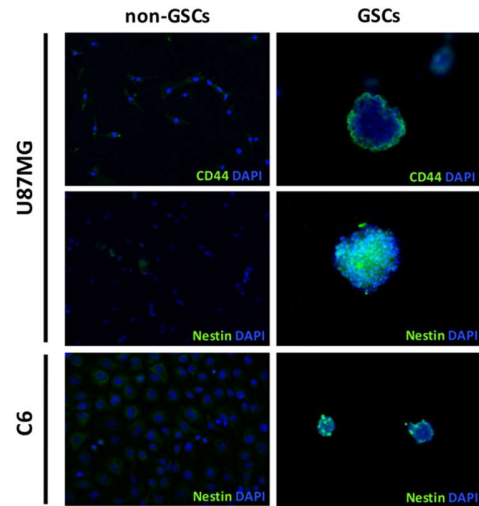

**Figure S3.** Stem cells markers expression in non-GSCs and GSCs of U87MG and C6 cell lines. **A** Expression of Nestin and CD44 in U87MG non-GSCs and GSCs by western blot.  $\beta$ -actin expression was used as normalizer. **B** Immunocytofluorescence of CD44 and Nestin in non-GSCs and GSCs of U87MG and C6 cell lines. A secondary antibody Alexa 488 (green) was used to detect CD44 and Nestin expression. DAPI (blue) stain was used as counterstain of nuclei. Magnification 200x.
